# Supplementary material
Source: PubMed Central journal article supplement (PMC4528724)
Supplement: supp_pp.114.252999_252999Supplemental_Table_1_RNA-seq_Reads.pdf [file supp_pp.114.252999_252999Supplemental_Table_1_RNA-seq_Reads.pdf]

| <b>Sample</b> | <b>Total reads</b> | <b>Aligned reads</b> | <b>% Alignment</b> |
|---------------|--------------------|----------------------|--------------------|
| <b>29d-1</b>  | <b>50,585,318</b>  | <b>47,809,911</b>    | <b>95%</b>         |
| <b>29d-2</b>  | <b>56,317,560</b>  | <b>52,160,493</b>    | <b>93%</b>         |
| <b>29d-3</b>  | <b>74,709,300</b>  | <b>70,289,777</b>    | <b>94%</b>         |
| <b>35d-1</b>  | <b>61,640,834</b>  | <b>56,589,865</b>    | <b>92%</b>         |
| <b>35d-2</b>  | <b>59,127,761</b>  | <b>56,810,411</b>    | <b>96%</b>         |
| <b>35d-3</b>  | <b>74,084,899</b>  | <b>69,345,945</b>    | <b>94%</b>         |
| <b>42d-1</b>  | <b>49,651,744</b>  | <b>47,583,338</b>    | <b>96%</b>         |
| <b>42d-2</b>  | <b>64,098,111</b>  | <b>59,183,060</b>    | <b>92%</b>         |
| <b>42d-3</b>  | <b>65,807,180</b>  | <b>60,144,918</b>    | <b>91%</b>         |
| <b>57d-1</b>  | <b>68,197,891</b>  | <b>61,300,159</b>    | <b>90%</b>         |
| <b>57d-2</b>  | <b>59,962,671</b>  | <b>57,633,192</b>    | <b>96%</b>         |
| <b>57d-3</b>  | <b>55,578,330</b>  | <b>53,576,333</b>    | <b>96%</b>         |

**Supplemental Table 1. Read and Alignment Summary for RNA-seq Libraries.**
