# Supplementary material
Source: PubMed Central journal article supplement (PMC4528724)
Supplement: supp_pp.114.252999_252999Supplemental_Table_2_ChIP-eq_Reads.pdf [file supp_pp.114.252999_252999Supplemental_Table_2_ChIP-eq_Reads.pdf]

| <b>H3K4me3</b> | <b>Total Reads</b> | <b>Aligned reads</b> | <b>% Alignment</b> | <b>Unique Reads</b> | <b>% Unique</b> |
|----------------|--------------------|----------------------|--------------------|---------------------|-----------------|
| 29d_ChIP       | 72,651,120         | 56,515,347           | 78%                | 12,471,170          | 22%             |
| 29d_input      | 241,859,534        | 129,130,261          | 60%                | 68,163,423          | 53%             |
| 35d_ChIP       | 94,549,362         | 65,914,502           | 70%                | 15,235,440          | 23%             |
| 35d_input      | 256,832,423        | 136,813,852          | 59%                | 67,497,500          | 49%             |
| 42d_ChIP       | 79,935,864         | 54,513,086           | 69%                | 13,123,594          | 24%             |
| 42d_input      | 219,636,473        | 127,612,919          | 62%                | 66,732,566          | 52%             |
| 57d_ChIP       | 150,759,372        | 83,983,773           | 56%                | 19,116,262          | 23%             |
| 57d_input      | 232,064,371        | 131,234,324          | 62%                | 66,787,863          | 51%             |

| <b>H3K9ac</b> | <b>Total Reads</b> | <b>Aligned reads</b> | <b>% Alignment</b> | <b>Unique Reads</b> | <b>% Unique</b> |
|---------------|--------------------|----------------------|--------------------|---------------------|-----------------|
| 30d_ChIP      | 72,033,414         | 52,750,857           | 80%                | 11,019,515          | 21%             |
| 30d_input     | 88,614,150         | 60,738,145           | 78%                | 16,030,599          | 26%             |
| 34d_ChIP      | 72,232,723         | 54,470,143           | 81%                | 10,605,940          | 19%             |
| 34d_input     | 92,834,798         | 61,939,766           | 77%                | 26,812,313          | 43%             |
| 42d_ChIP      | 81,732,114         | 62,777,923           | 82%                | 6,623,315           | 11%             |
| 42d_input     | 88,141,553         | 61,854,129           | 78%                | 6,449,022           | 10%             |

**Supplemental Table 2. Read and Alignment Summary for ChIP-seq Libraries.**
