# Supplementary material
Source: PubMed Central journal article supplement (PMC4528724)
Supplement: supp_pp.114.252999_252999Supplemental_Table_3_Comparison_to_Developmental_Leaf_Senescence.pdf [file supp_pp.114.252999_252999Supplemental_Table_3_Comparison_to_Developmental_Leaf_Senescence.pdf]

|           | 29d          | 35d          | 42d          | 57d         |        | Plant Cell 23:873 Cluster |
|-----------|--------------|--------------|--------------|-------------|--------|---------------------------|
| AT4G21980 | <b>60.8</b>  | 60.2         | 85.5         | 118.2       | ATG8A  | U1                        |
| AT4G04620 | <b>73.7</b>  | 81.5         | 106.3        | 83.4        | ATG8B  | U1                        |
| AT4G11910 | <b>12.7</b>  | <b>82.7</b>  | 126.4        | 120.5       | SGR2   | U1                        |
| AT2G29350 | 0.3          | <b>2.8</b>   | <b>79.5</b>  | 198.9       | SAG13  | U2                        |
| AT4G22920 | <b>37.4</b>  | <b>101.4</b> | 141.0        | 149.2       | SGR1   | U2                        |
| AT5G05410 | <b>17.5</b>  | <b>64.7</b>  | 78.5         | 30.2        | DREB2A | U2                        |
| AT5G51070 | <b>407.4</b> | <b>592.4</b> | 823.7        | 705.4       | ERD1   | U2                        |
| AT5G66400 | <b>163.5</b> | <b>191.7</b> | 71.0         | 36.3        | RAB18  | U2                        |
| AT5G13080 | <b>0.5</b>   | <b>4.6</b>   | 25.0         | 204.1       | WRKY75 | U3                        |
| AT3G25760 | <b>2.7</b>   | <b>124.9</b> | 239.6        | 54.2        | AOC1   | U3                        |
| AT1G19180 | <b>64.9</b>  | <b>556.4</b> | 801.1        | 483.4       | JAZ1   | U3                        |
| AT2G06050 | <b>6.1</b>   | <b>440.6</b> | 445.7        | 146.8       | OPR3   | U3                        |
| AT1G72450 | <b>105.0</b> | <b>350.0</b> | 558.0        | 263.3       | JAZ6   | U3                        |
| AT2G33380 | 30.3         | <b>44.8</b>  | <b>140.8</b> | 193.3       | RD20   | U3                        |
| AT4G32810 | 0.1          | <b>4.4</b>   | <b>26.5</b>  | 38.3        | CCD8   | U5                        |
| AT5G04200 | 2.3          | 2.0          | <b>3.1</b>   | <b>6.0</b>  | MC9    | U5                        |
| AT5G64810 | 0.1          | 0.0          | <b>3.2</b>   | <b>15.6</b> | WRKY51 | U6                        |
| AT5G45890 | 0.0          | 0.2          | <b>4.7</b>   | <b>72.5</b> | SAG12  | U7                        |

Supplemental Table 3. RPKM values (mean of three replicates) are shown along with the up-regulation cluster that was assigned in Breeze et al., 2011, which analyzed leaf 7. Bold RPKM values show the largest fold-change, except in the case of the first two genes in which initial RPKM values were high. U1 were up-regulated by the first time point (19d), and are also up-regulated at the first time point in the RNA-seq data. U2 (21d) and U3 (23d) are mostly up-regulated (9/11) in the first time interval (29-35d), although some (2/11) showed a greater fold-induction in the second interval (35-42d). U5 (27d), U6 (29d) and U7 (31d) were expressed late in leaf senescence, and showed a similar pattern in the RNA-seq data with highest values at 57d. The RNA-seq data generally follow the developmental leaf senescence data previously described, however with less temporal refinement.
