# Supplementary material
Source: PubMed Central journal article supplement (PMC4528724)

**A H3K9ac\_Loss**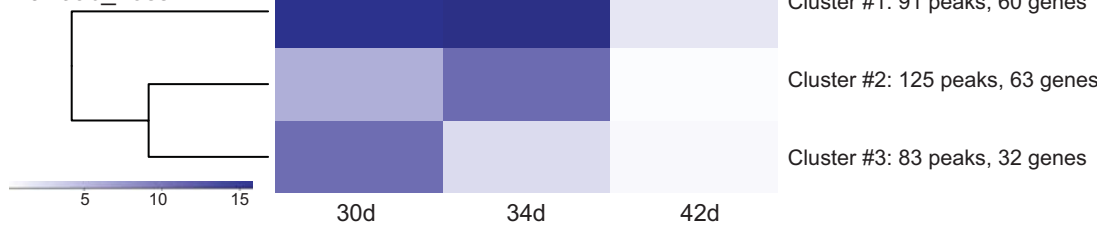**B H3K9ac Marks****Gene Expression**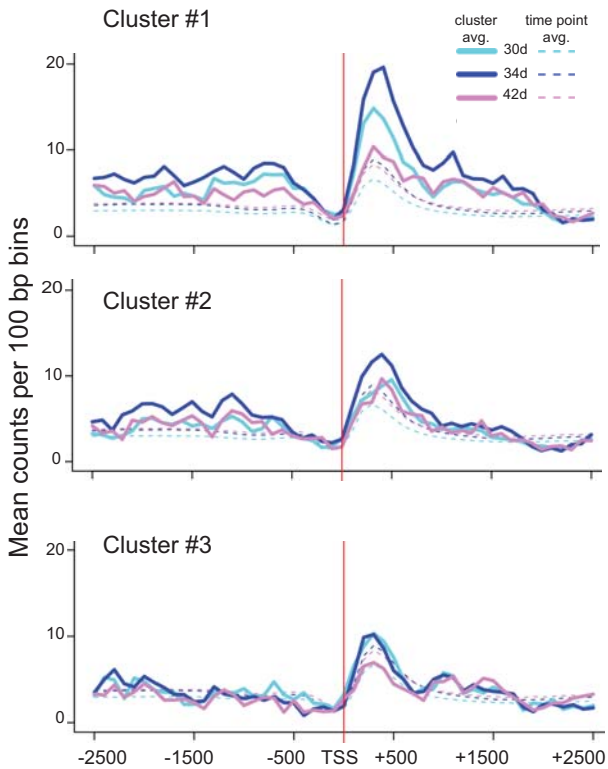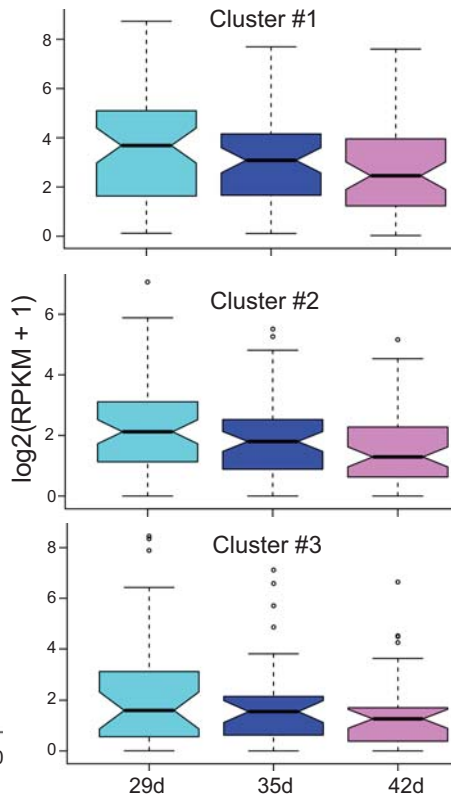

Supplement: supp_pp.114.252999_252999SuppFig4_K9_Loss.pdf [file supp_pp.114.252999_252999SuppFig4_K9_Loss.pdf]

RNA-seq RPKMs

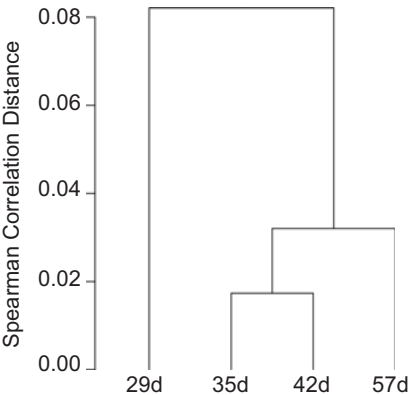

H3K4me3 gene coverage

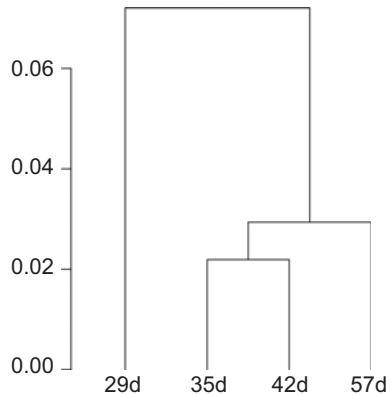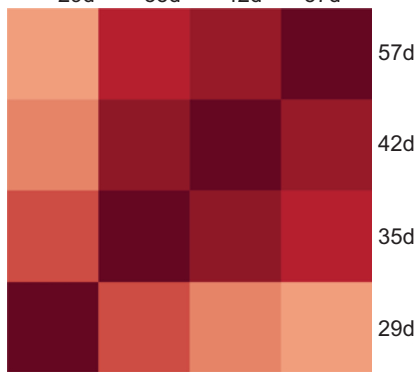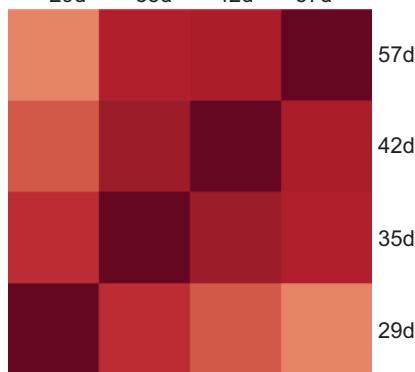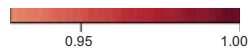

Supplement: supp_pp.114.252999_252999SuppFig5_dendrograms.pdf [file supp_pp.114.252999_252999SuppFig5_dendrograms.pdf]

A. *WRKY53*B. *SAG12*C. *At1g73220*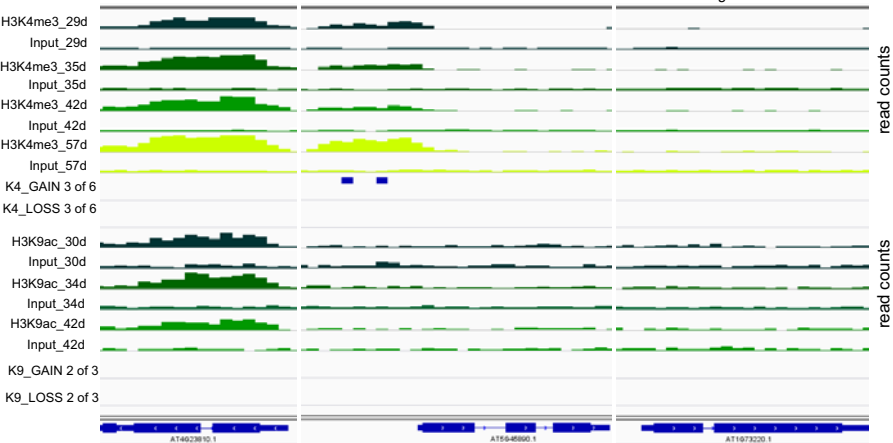

Supplement: supp_pp.114.252999_252999SuppFig6_WRKY53_SAG12_At1g73220.pdf [file supp_pp.114.252999_252999SuppFig6_WRKY53_SAG12_At1g73220.pdf]
